# Supplementary material
Source: PubMed Central journal article supplement (PMC3287957)
Supplement: NIHMS352296-supplement-Supplementary_Table_I.pdf [file NIHMS352296-supplement-Supplementary_Table_I.pdf]

**Supplementary Table I.** Kinase consensus residues. The thirteen kinases listed in Table I were structurally aligned. The amino acid or amino acid category of each consensus residue is listed under “type”. Under each kinase is listed the residue identifier corresponding to the consensus. For conserved amino acid categories the specific amino acid found in each kinase is listed before the identifier. Samples missing a consensus residue have an “x”. Those samples that have a similar residue in place of a conserved amino acid have the shared category listed after the identifier. b, basic; h, hydrophobic; l, aliphatic; p, polar; r, aromatic; s, small; v, very small.

| ID | Type | Kinase |      |      |      |      |        |               |      |       |       |       |       |       |
|----|------|--------|------|------|------|------|--------|---------------|------|-------|-------|-------|-------|-------|
|    |      | Akt2   | CDK2 | CK1  | CK2  | DAPK | IRK    | p38- $\gamma$ | PhK  | Pim-1 | PKA   | Rio2  | Sky1P | TAO2  |
| 1  | h    | L158   | I10  | I18  | V45  | L19  | L1002  | V33           | L25  | L44   | L49   | M98   | L164  | I34   |
| 2  | G    | 159    | 11   | 19   | 46   | 20   | 1003   | x             | 26   | 45    | 50    | x     | 165   | 35    |
| 3  | G    | 161    | 13   | 21   | 48   | 22   | 1005   | x             | 28   | x     | 52    | x     | 167   | 37    |
| 4  | V    | 166    | 18   | I26l | 53   | 27   | 1010   | 41            | 33   | 52    | 57    | 106   | 172   | 42    |
| 5  | A    | 179    | 31   | 39   | I66l | 40   | 1028   | 54            | 46   | 65    | 70    | V118l | 185   | 55    |
| 6  | K    | 181    | 33   | 41   | 68   | 42   | 1030   | 56            | 48   | 67    | 72    | 120   | 187   | 57    |
| 7  | E    | 200    | 51   | 55   | 81   | 64   | 1047   | 74            | 73   | 89    | 91    | 154   | 202   | 76    |
| 8  | L    | 204    | 55   | Y59h | 85   | 68   | M1051h | 78            | 77   | 93    | 95    | 158   | 206   | 80    |
| 9  | L    | 215    | 66   | V71l | 97   | 79   | 1062   | 89            | 89   | 106   | 106   | V169l | 228   | Y91h  |
| 10 | h    | F227   | L78  | L83  | L111 | L91  | V1074  | L107          | L101 | L118  | M118  | V177  | M244  | L103  |
| 11 | l    | V228   | V79  | V84  | I112 | I92  | V1075  | V108          | V102 | I119  | V119  | L178  | V245  | V104  |
| 12 | h    | M229   | F80  | I85  | F113 | L93  | M1076  | M109          | F103 | L120  | M120  | M179  | F246  | M105  |
| 13 | E    | 230    | 81   | x    | 114  | 94   | 1077   | x             | x    | 121   | 121   | 180   | 247   | 106   |
| 14 | h    | A232   | L83  | L88  | V116 | V96  | M1079  | M112          | M106 | P123  | V123  | I182  | L249  | C108  |
| 15 | L    | 237    | 87   | 92   | x    | 101  | 1084   | 116           | 111  | 129   | M128h | 187   | 253   | A112l |
| 16 | h    | F247   | I99  | F103 | L128 | L111 | P1104  | L125          | L121 | L139  | F138  | V192  | I265  | L123  |
| 17 | h    | I259   | L111 | M115 | L140 | I123 | I1116  | M137          | L133 | V151  | I150  | I202  | L277  | A135  |
| 18 | h    | L263   | L115 | V119 | L144 | V127 | M1120  | L141          | I137 | V155  | F154  | V206  | L281  | L139  |
| 19 | h    | L266   | C118 | I122 | C147 | L130 | L1123  | I144          | L140 | C158  | L157  | F209  | M284  | L142  |
| 20 | H    | 267    | 119  | 123  | 148  | 131  | x      | 145           | 141  | 159   | 158   | x     | 285   | 143   |
| 21 | h    | V271   | V123 | L127 | I152 | I135 | F1128  | I149          | I145 | V163  | L162  | I214  | I290  | M147  |
| 22 | h    | V272   | L124 | V128 | M153 | A136 | V1129  | I150          | V146 | L164  | I163  | V215  | I291  | I148  |

|    |   |       |      |       |       |      |        |      |      |      |       |       |       |      |
|----|---|-------|------|-------|-------|------|--------|------|------|------|-------|-------|-------|------|
| 23 | H | Y273r | 125  | Y129r | 154   | 137  | 1130   | 151  | 147  | 165  | Y164r | 216   | 292   | 149  |
| 24 | R | 274   | 126  | 130   | 155   | x    | 1131   | 152  | 148  | 166  | 165   | x     | x     | 150  |
| 25 | D | 275   | 127  | 131   | 156   | 139  | 1132   | 153  | 149  | 167  | 166   | 218   | 294   | 151  |
| 26 | l | I276  | L128 | I132  | V157  | L140 | L1133  | L154 | L150 | I168 | L167  | L219  | I295  | V152 |
| 27 | K | 277   | 129  | 133   | 158   | 141  | R1136b | 155  | 151  | 169  | 168   | S220p | 296   | 153  |
| 28 | N | 280   | 132  | 136   | 161   | 144  | 1137   | 158  | 154  | 172  | 171   | 223   | 299   | 156  |
| 29 | h | L281  | L133 | F137  | V162  | I145 | C1138  | L159 | I155 | I173 | L172  | V224  | V300  | I157 |
| 30 | h | M282  | L134 | L138  | M163  | M146 | M1139  | A160 | L156 | L174 | L173  | L225  | L301  | L158 |
| 31 | h | L283  | I135 | I139  | I164  | L147 | V1140  | V161 | L157 | I175 | I174  | V226  | M302  | L159 |
| 32 | l | I289  | I141 | I150  | L171  | I157 | V1146  | L167 | I163 | L182 | I180  | I231  | I546  | V165 |
| 33 | l | I291  | L143 | V152  | L173  | I159 | I1148  | I169 | L165 | L184 | V182  | I233  | I548  | L167 |
| 34 | D | 293   | 145  | 154   | 175   | 161  | 1150   | 171  | 167  | 186  | 184   | 235   | 550   | 169  |
| 35 | F | 294   | 146  | 155   | W176r | 162  | 1151   | 172  | 168  | 187  | 185   | 236   | L551h | 170  |
| 36 | G | 295   | 147  | 156   | 177   | 163  | 1152   | 173  | 169  | 188  | 186   | P237s | 552   | 171  |
| 37 | s | C297  | A149 | V158  | A179  | A165 | T1154  | A175 | S171 | G190 | A188  | S239  | A554  | A173 |
| 38 | T | 313   | 165  | 181   | S194s | 180  | x      | 188  | 186  | 204  | 201   | x     | 567   | 185  |
| 39 | P | 319   | 171  | x     | 200   | 186  | 1178   | 194  | 192  | 210  | 207   | x     | 573   | 191  |
| 40 | E | 320   | 172  | N188p | 201   | 187  | 1179   | 195  | 193  | 211  | 208   | x     | 574   | 192  |
| 41 | D | 332   | 185  | 200   | 214   | 199  | 1191   | 208  | 211  | x    | 220   | x     | 586   | 207  |
| 42 | W | 334   | 187  | x     | 216   | 201  | 1193   | 210  | 213  | 226  | 222   | x     | 588   | 209  |
| 43 | G | 337   | 190  | 205   | 219   | 204  | 1196   | 213  | 216  | 229  | 225   | I259l | A591v | 212  |
| 44 | h | M343  | M196 | F211  | M225  | L210 | I1202  | M219 | L222 | M235 | M231  | F262  | L597  | L218 |
| 45 | h | L384  | M266 | Y256  | L304  | L255 | C1245  | M291 | F267 | C270 | L272  | A275  | M686  | C261 |
| 46 | L | 385   | 267  | M257h | 305   | 256  | W1246h | 292  | 268  | 271  | 273   | I272l | 687   | 262  |
| 47 | R | 392   | 274  | x     | 312   | 263  | 1253   | 299  | 275  | 278  | 280   | x     | 694   | 269  |
| 48 | H | 406   | 283  | x     | 321   | 272  | x      | 308  | 284  | 287  | 294   | x     | 703   | 278  |
