# Supplementary material
Source: PubMed Central journal article supplement (PMC3287957)
Supplement: NIHMS352296-supplement-Supplementary_TableII.pdf [file NIHMS352296-supplement-Supplementary_TableII.pdf]

**Supplementary Table II.** Conserved water interactions. Oxygen and nitrogen atoms within 3.2 Å of each conserved water are listed by residue number. Conserved residues are in bold and organized by row. Dashes indicate samples missing the conserved water.

| Water                  | Kinase                  |                        |                         |                        |                          |                        |                 |                         |                        |                         |                        |                 |                         |
|------------------------|-------------------------|------------------------|-------------------------|------------------------|--------------------------|------------------------|-----------------|-------------------------|------------------------|-------------------------|------------------------|-----------------|-------------------------|
|                        | Akt2                    | CDK2                   | CK1                     | CK2                    | DAPK                     | IRK                    | p38- $\gamma$   | PhK                     | Pim-1                  | PKA                     | Rio2                   | Sky1P           | TAO2                    |
| A <sub>w</sub>         | <b>OE2-E200</b>         | <b>OE2-E51</b>         | <b>OE2-E55</b>          | <b>OE2-E81</b>         | <b>OE2-E64</b>           | <b>OE2-E1047</b>       | <b>OE2-E74</b>  | <b>OE2-E73</b>          |                        | <b>OE2-E91</b>          | <b>OE2-E154</b>        |                 | <b>OE1-E76</b>          |
|                        | <b>N-F294</b>           | <b>N-F146</b>          |                         |                        | <b>N-F162</b>            | <b>N-F1151</b>         |                 | <b>N-F168</b>           |                        | <b>N-F185</b>           |                        |                 | <b>N-F170</b>           |
|                        |                         |                        | OH-Y59<br>N-D154        | N-W176                 |                          |                        |                 |                         |                        |                         |                        | N-D235          | -                       |
|                        | O-H <sub>2</sub> O(265) | O-H <sub>2</sub> O(74) | O-H <sub>2</sub> O(403) | O-H <sub>2</sub> O(13) | O-H <sub>2</sub> O(3400) | O-H <sub>2</sub> O(31) |                 | O-H <sub>2</sub> O(402) |                        |                         | O-H <sub>2</sub> O(13) |                 | O-H <sub>2</sub> O(265) |
| B <sub>w</sub>         |                         | <b>O-L55</b>           | <b>O-Y59</b>            |                        | <b>O-L68</b>             | <b>O-M1051</b>         |                 | <b>O-L77</b>            |                        |                         |                        | <b>O-L206</b>   |                         |
|                        |                         | <b>N-L66</b>           |                         |                        | <b>N-L79</b>             | <b>N-L1062</b>         |                 | <b>N-L89</b>            |                        |                         |                        | <b>N-L228</b>   | <b>N-Y91</b>            |
|                        | O-T207                  |                        | O-P69                   |                        | O-I71                    | O-F1054                | O-M81           | O-I87                   |                        | O-L95                   |                        | OD1-N210        | O-L83                   |
|                        | OG1-T207                |                        |                         |                        | -                        |                        |                 | O-I87                   |                        |                         |                        | -               | ND2-N210                |
|                        | O-T213                  |                        |                         |                        |                          |                        |                 |                         |                        |                         |                        |                 |                         |
|                        | O-H <sub>2</sub> O(33)  |                        | O-H <sub>2</sub> O(442) |                        | O-H <sub>2</sub> O(3021) | O-H <sub>2</sub> O(41) |                 |                         |                        | O-H <sub>2</sub> O(406) |                        |                 | O-H <sub>2</sub> O(315) |
| O-H <sub>2</sub> O(36) |                         |                        |                         |                        |                          |                        |                 |                         |                        |                         |                        |                 |                         |
| C <sub>w</sub>         | <b>O-Y273</b>           | <b>O-H125</b>          | <b>O-Y129</b>           | <b>O-H154</b>          | <b>O-H137</b>            | <b>O-H1130</b>         | <b>O-H151</b>   | <b>O-H147</b>           | <b>O-H165</b>          |                         |                        |                 | <b>O-H149</b>           |
|                        | <b>O-D293</b>           | <b>O-D145</b>          |                         | <b>O-D175</b>          | <b>O-D161</b>            | <b>O-D1150</b>         | <b>O-D171</b>   | <b>O-D167</b>           | <b>O-D186</b>          | <b>O-D184</b>           |                        |                 | <b>O-D169</b>           |
|                        | N-L296                  | N-L148                 | N-M157                  | N-L178                 | N-L164                   | N-M1153                | N-L174          | N-F170                  | N-S189                 | N-F187                  | -                      | -               | N-S172                  |
|                        |                         | N-A149                 |                         | N-A179                 | N-A165                   | N-T1154                |                 |                         | N-G190                 |                         |                        |                 | N-A173                  |
|                        |                         |                        |                         |                        |                          |                        |                 |                         |                        | O-H <sub>2</sub> O(424) |                        |                 |                         |
| D <sub>w</sub>         | <b>OD1-D275</b>         |                        |                         | <b>OD1-D156</b>        |                          | <b>OD1-D1132</b>       | <b>OD1-D153</b> |                         | <b>OD1-D167</b>        |                         |                        |                 | <b>OD1-D151</b>         |
|                        | <b>O-I276</b>           | -                      | <b>O-I132</b>           | <b>O-V157</b>          | <b>O-L140</b>            | <b>O-L1133</b>         | <b>O-L154</b>   | -                       | <b>O-I168</b>          | <b>O-L167</b>           | <b>O-L219</b>          | -               | <b>O-V152</b>           |
|                        |                         |                        |                         | N-S194                 |                          |                        |                 |                         |                        |                         | ND2-N257               |                 |                         |
|                        | O-H <sub>2</sub> O(96)  |                        |                         |                        | O-H <sub>2</sub> O(458)  | O-H <sub>2</sub> O(63) |                 |                         |                        | O-H <sub>2</sub> O(576) |                        |                 | O-H <sub>2</sub> O(54)  |
|                        |                         |                        |                         |                        | O-H <sub>2</sub> O(439)  |                        |                 |                         |                        |                         |                        |                 |                         |
| E <sub>w</sub>         |                         |                        | <b>N-D131</b>           |                        |                          |                        | <b>N-D153</b>   |                         |                        |                         |                        | <b>N-D294</b>   | <b>N-D151</b>           |
|                        | <b>N-I276</b>           | <b>N-L128</b>          | <b>N-I132</b>           | <b>N-V157</b>          | <b>N-L140</b>            | <b>N-L1133</b>         | <b>N-L154</b>   |                         | <b>N-I168</b>          | <b>N-L167</b>           |                        | <b>N-I295</b>   | <b>N-V152</b>           |
|                        | <b>OD1-D332</b>         | <b>OD1-D185</b>        |                         | <b>OD1-D214</b>        | <b>OD1-D199</b>          | <b>OD1-D1191</b>       | <b>OD1-D208</b> | <b>OD1-D211</b>         |                        | <b>OD1-D220</b>         | -                      | <b>OD1-D586</b> | <b>OD1-D207</b>         |
|                        |                         | OG-S188                |                         | OG-S217                | OG-S202                  | OG-S1194               | OG-S211         | OG-S214                 | OG-S227                |                         |                        | OG-S589         | OG-S210                 |
|                        |                         |                        | O-H <sub>2</sub> O(457) |                        | O-H <sub>2</sub> O(439)  | O-H <sub>2</sub> O(34) |                 | O-H <sub>2</sub> O(422) | O-H <sub>2</sub> O(22) | O-H <sub>2</sub> O(411) |                        |                 |                         |
| F <sub>w</sub>         | <b>NE1-W334</b>         | <b>NE1-W187</b>        |                         | <b>NE1-W216</b>        | <b>NE1-W201</b>          | <b>NE1-W1193</b>       | <b>NE1-W210</b> | <b>NE1-W213</b>         | <b>NE1-W226</b>        | <b>NE1-W222</b>         |                        | <b>NE1-W588</b> | <b>NE1-W209</b>         |
|                        | O-E315                  | O-W167                 | -                       | O-Y196                 | O-E182                   | O-R1174                | O-W190          | O-S188                  | O-V206                 | O-E203                  | OD1-N257               | O-E569          | O-Y187                  |

O-L317

O-R169  
NE2-Q211

O-K198

O-V184

OH-Y1210

O-R192

O-L190

O-S208

O-L205

O-H2O235

O-R571  
NE2-H618

O-M189

O-H<sub>2</sub>O(20)

O-H<sub>2</sub>O(278)

---
